# Supplementary material for: HIV mortality in urban slums of Nairobi, Kenya 2003–2010: a period effect analysis
Source: BMC Public Health. 2013 Jun 17;13:588. doi: 10.1186/1471-2458-13-588 (PMC3685607; doi:10.1186/1471-2458-13-588)
Supplement: Additional file 1 — All-cause and HIV-related mortality rates by period, gender and age group (after imputation). [file 1471-2458-13-588-S1.xls]

## Sheet: Imputed
Table S1. All-cause and HIV related mortality rates by period, gender and age group (after imputation).
	All-Cause Mortality							HIV Related Mortality
	2003 - 2006			2007 - 2010				2003 - 2006			2007 - 2010
	Person Years	Deaths	Mortality Rate	Person Years	Deaths	Mortality Rate	change in rate	Person Years	Deaths	Mortality Rate	Person Years	Deaths	Mortality Rate	change in rate
Overall	158473	1057	6.66992	165110	1013	6.13529	-0.53463	158473	524	3.30656	165110	382	2.3136	-0.99296
Gender
Female	64458.3	483	7.49322	69285.8	386	5.57112	-1.9221	64458.3	301	4.66969	69285.8	213	3.07422	-1.59547
Male	94014.4	574	6.10545	95824.6	627	6.5432	0.43775	94014.4	223	2.37198	95824.6	169	1.76364	-0.60834
Age group
15-24	56656.6	174	3.07113	54497.3	152	2.78913	-0.282	56656.6	57	1.00606	54497.3	34	0.62388	-0.38218
25-34	62350.5	411	6.59177	64458.7	380	5.89525	-0.69652	62350.5	220	3.52844	64458.7	137	2.12539	-1.40305
35-44	27950.4	308	11.0195	31882.7	310	9.72315	-1.29636	27950.4	169	6.04642	31882.7	142	4.45383	-1.59259
45-54	11515.1	164	14.2421	14271.8	171	11.9817	-2.26045	11515.1	78	6.7737	14271.8	69	4.83472	-1.93898
